# Supplementary material
Source: publisher figshare collection journal article supplement (https://frontiersin.figshare.com/ndownloader/files/17485178)
Supplement: Supplementary file 1 [file 17485178]

**Supplementary Figure S3** Bar plots of individual membership coefficients for each value of  $K$ , and each mode within 20 total runs of a given  $K$ . Each vertical bar represents one individual.

Major modes for the uploaded data:

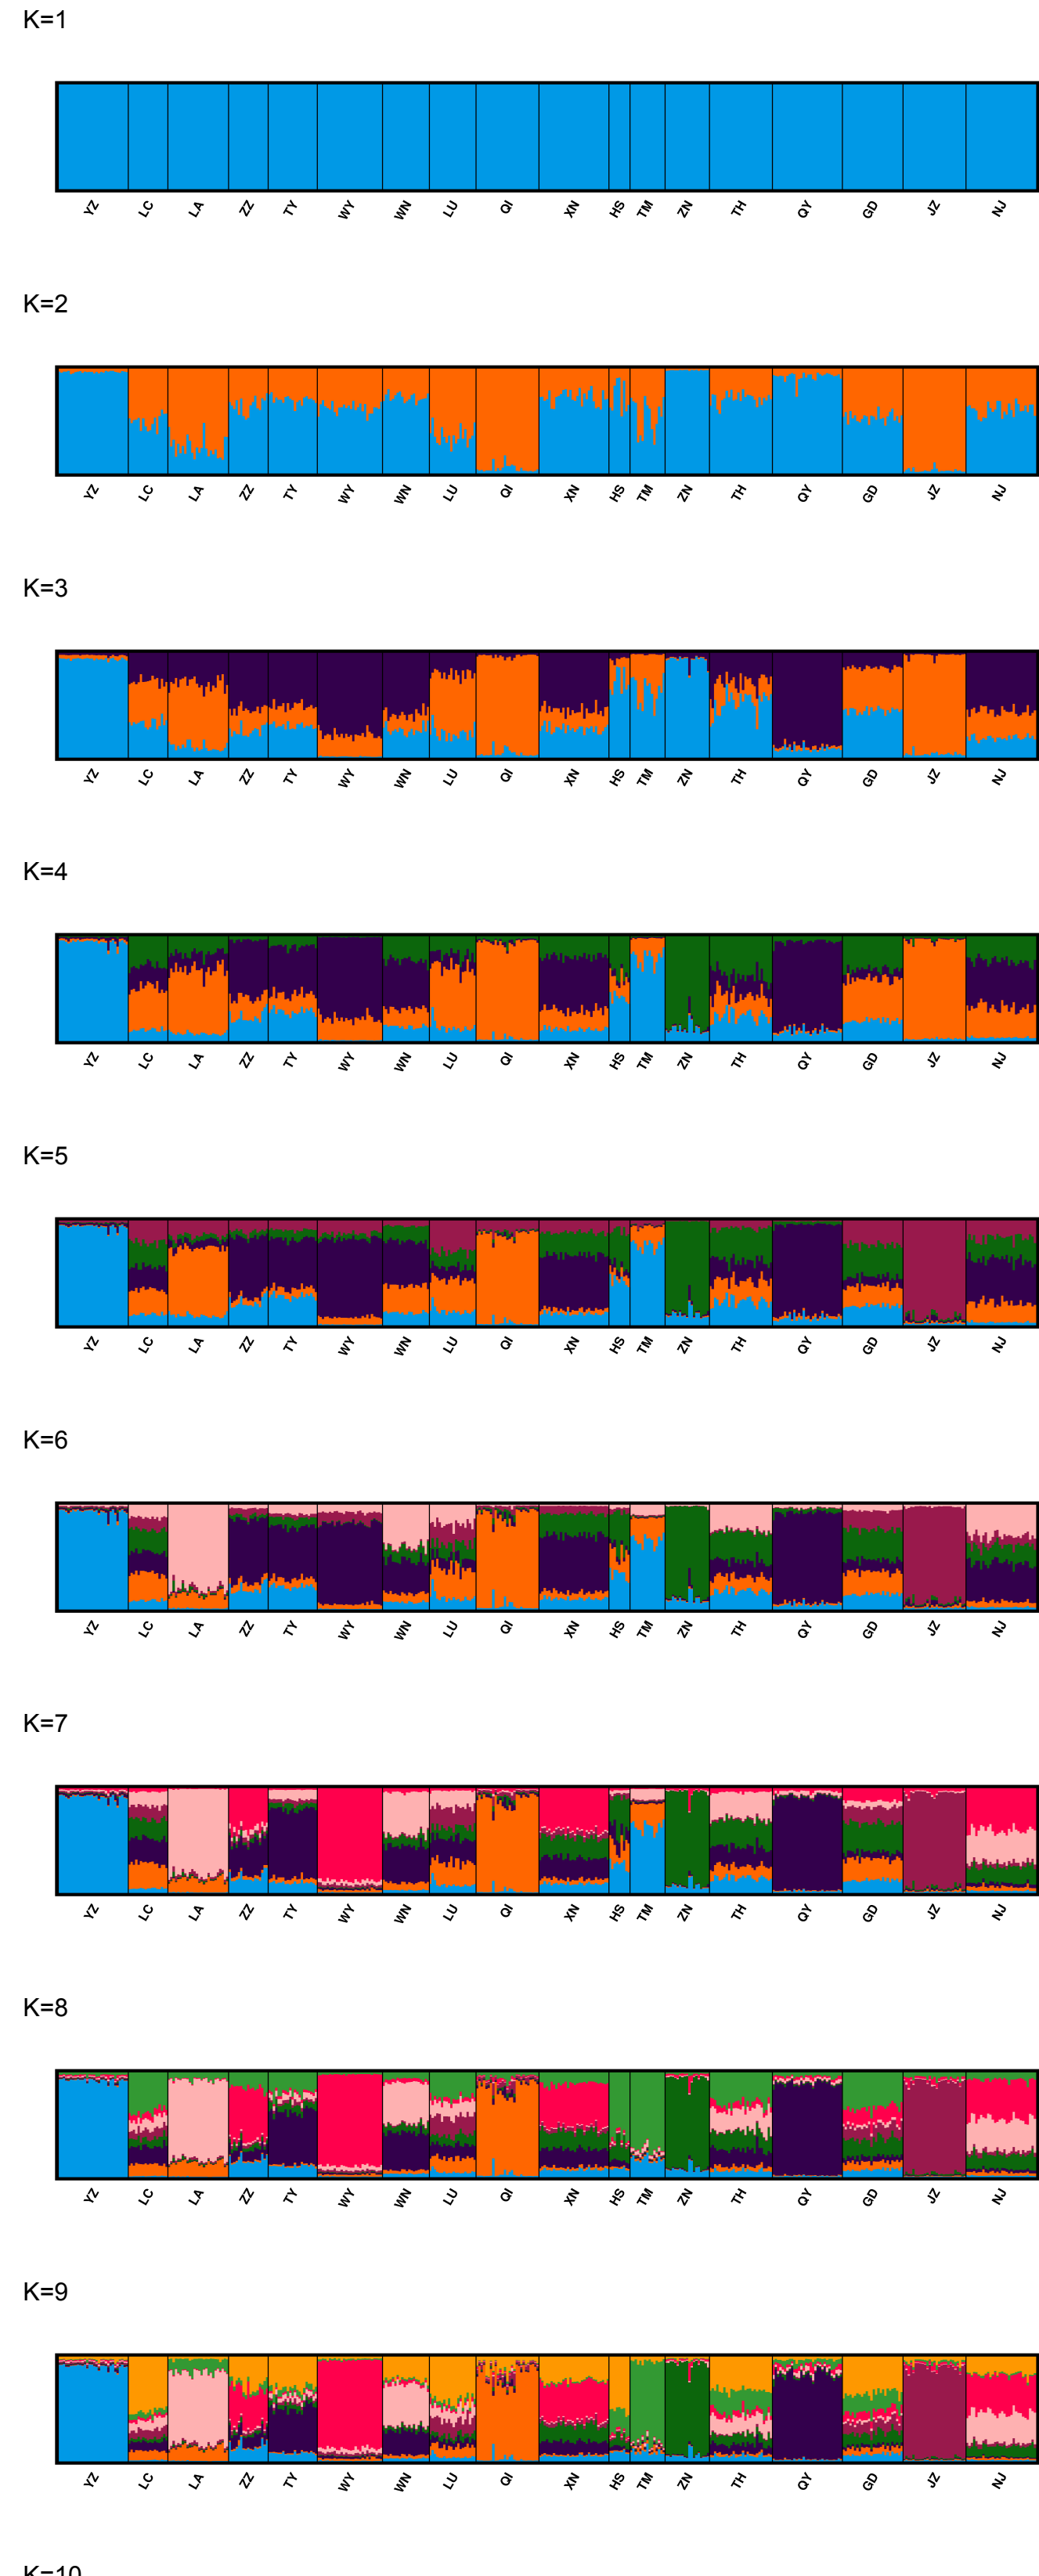

Minor modes for the uploaded data:

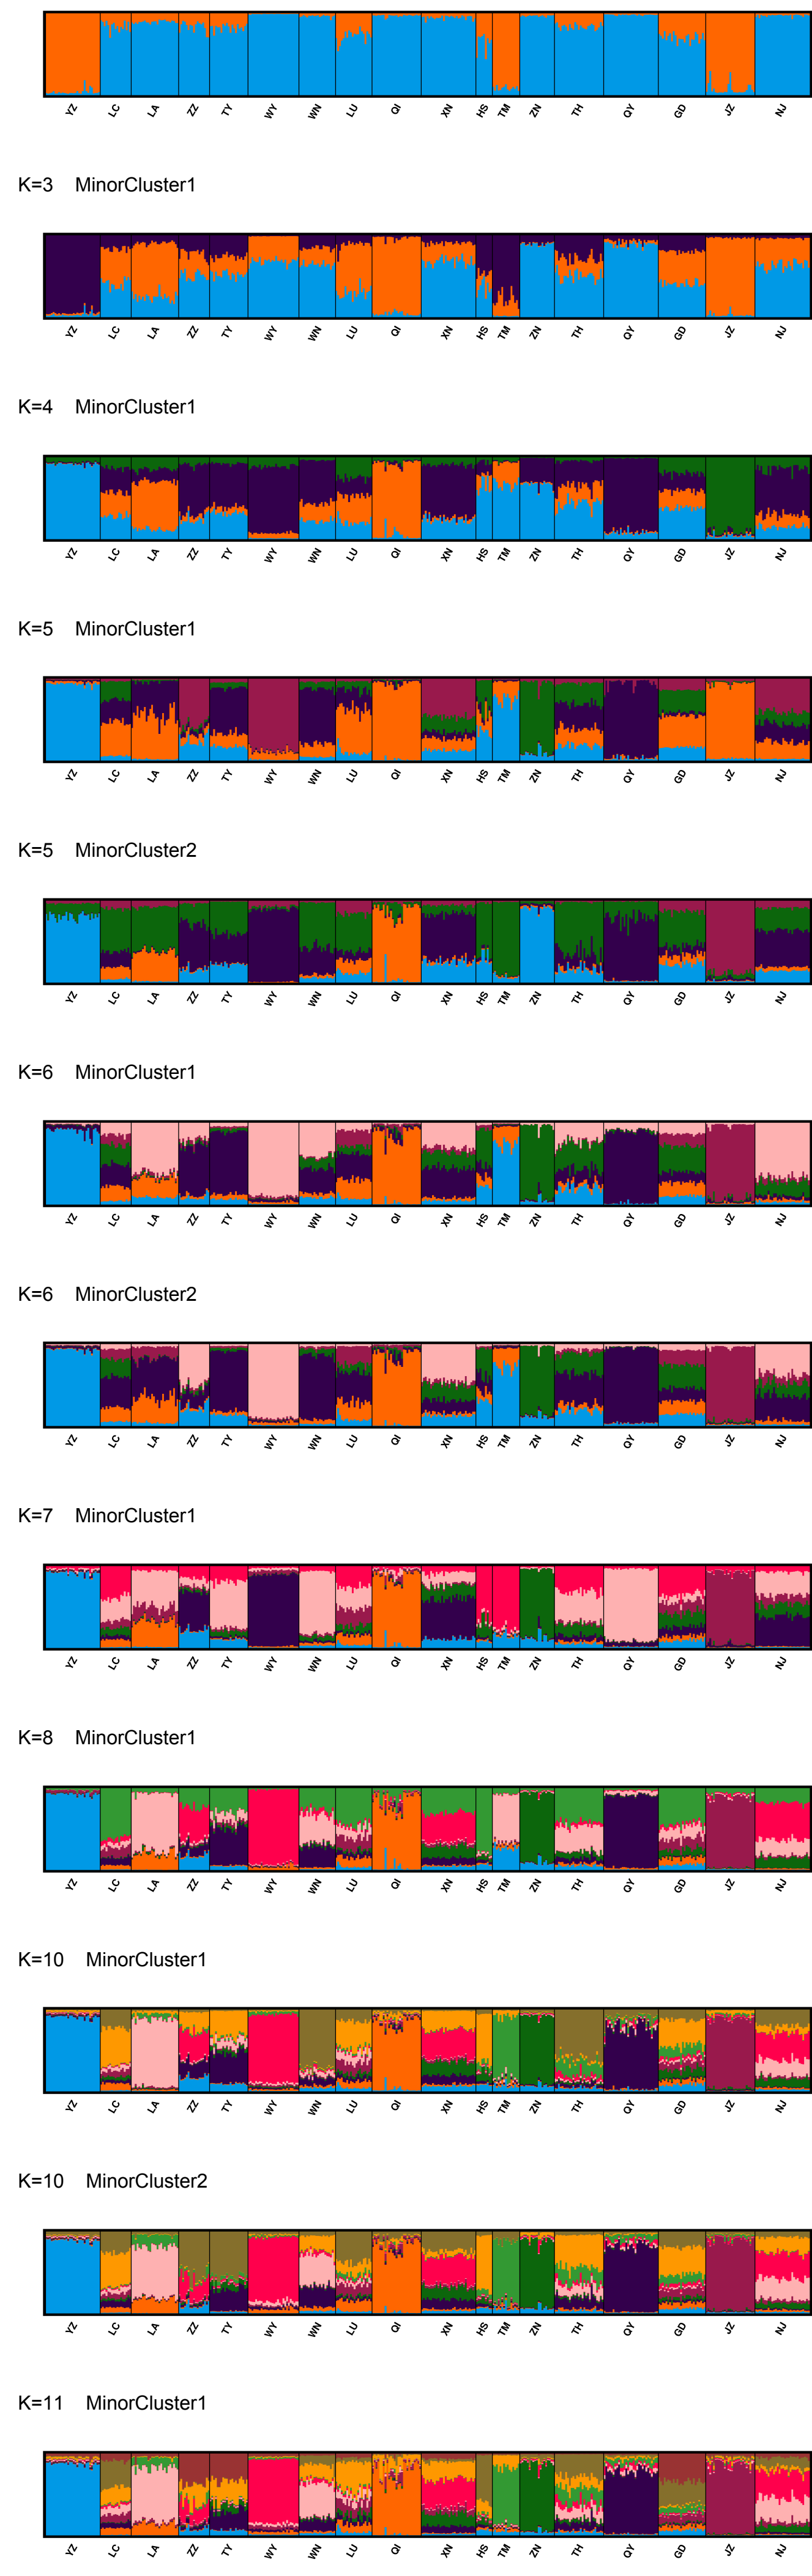

Division of runs by mode:

- K=1 20/20
- K=2 17/20, 2/20
- K=3 13/20, 7/20
- K=4 10/20, 10/20
- K=5 15/20, 3/20, 2/20
- K=6 13/20, 3/20, 3/20
- K=7 15/20, 4/20
- K=8 18/20, 2/20
- K=9 20/20
- K=10 12/20, 4/20, 4/20
- K=11 17/20, 2/20
